# Supplementary material for: Clinical and phototrichogrammatic evaluation of estradiol replacement therapy on hair growth in postmenopausal Japanese women with female pattern hair loss: a pilot study
Source: PubMed Central journal article supplement — Int J Womens Dermatol. 2023 Nov 1;9(4):e109. doi: 10.1097/JW9.0000000000000109 (PMC10615536; doi:10.1097/jw9.0000000000000109), 2023-11-01
Supplement: jw9-9-e109-s002.pdf [file jw9-9-e109-s002.pdf]

**Supplemental Table.** Changes in the levels of biochemical, hematological, hair-related, and hormonal factors of serum constituents

| Category             | Test                       | Unit                 | Initial |                    | 3M      |         |          |        |          | 6M      |        |          |        |          | Initial-6M |          |
|----------------------|----------------------------|----------------------|---------|--------------------|---------|---------|----------|--------|----------|---------|--------|----------|--------|----------|------------|----------|
|                      |                            |                      | Mean    | Standard Deviation | mean    | std     | /Initial | t-test | P < 0.05 | mean    | std    | /Initial | t-test | P < 0.05 | ANOVA      | P < 0.05 |
| <b>Hematological</b> | White Blood Cell Counts    | /μL                  | 5290.91 | 907.14             | 5018.18 | 1099.83 | 95%      | 0.377  |          | 5163.64 | 893.61 | 98%      | 0.687  |          | 0.6394     |          |
|                      | Red Blood Cell Counts      | ×10 <sup>4</sup> /μL | 469.91  | 16.83              | 457.36  | 24.61   | 97%      | 0.017  | *        | 457.82  | 15.23  | 97%      | 0.016  | *        | 0.0274     | *        |
|                      | Hemoglobin                 | g/dL                 | 13.76   | 0.74               | 13.40   | 0.66    | 97%      | 0.024  | *        | 13.42   | 0.65   | 97%      | 0.071  |          | 0.06       |          |
|                      | Hematocrit                 | %                    | 42.64   | 1.81               | 41.92   | 1.90    | 98%      | 0.115  |          | 41.71   | 1.61   | 98%      | 0.124  |          | 0.1805     |          |
|                      | Platelet Counts            | ×10 <sup>4</sup> /μL | 24.44   | 4.49               | 23.77   | 4.88    | 97%      | 0.385  |          | 23.86   | 5.16   | 98%      | 0.375  |          | 0.6065     |          |
| <b>Biochemical</b>   | Aspartate Aminotransferase | U/L                  | 20.64   | 3.64               | 18.36   | 2.29    | 89%      | 0.016  | *        | 21.09   | 4.23   | 102%     | 0.683  |          | 0.0197     | *        |
|                      | Alanine Aminotransferase   | U/L                  | 19.73   | 5.41               | 16.18   | 4.17    | 82%      | 0.054  |          | 20.27   | 11.52  | 103%     | 0.836  |          | 0.2577     |          |
|                      | γ-Glutamyl Transpeptidase  | U/L                  | 42.45   | 43.34              | 24.45   | 16.18   | 58%      | 0.075  |          | 30.09   | 30.82  | 71%      | 0.031  | *        | 0.0499     | *        |
|                      | Total Cholesterol          | mg/dL                | 222.82  | 31.98              | 214.91  | 33.32   | 96%      | 0.125  |          | 210.82  | 35.81  | 95%      | 0.014  | *        | 0.058      |          |
|                      | HDL-Cholesterol            | mg/dL                | 80.45   | 13.79              | 78.91   | 12.41   | 98%      | 0.343  |          | 80.91   | 13.66  | 101%     | 0.843  |          | 0.6332     |          |

|                                     |            |            |       |            |           |          |           |   |            |           |          |           |   |            |   |
|-------------------------------------|------------|------------|-------|------------|-----------|----------|-----------|---|------------|-----------|----------|-----------|---|------------|---|
| LDL-Cholesterol                     | mg/d<br>L  | 125.<br>09 | 34.15 | 116.<br>18 | 33.0<br>5 | 93%      | 0.0<br>25 | * | 111.<br>55 | 36.3<br>9 | 89%      | 0.0<br>04 | * | 0.002<br>4 | * |
| Triglyceride                        | mg/d<br>L  | 107.<br>18 | 45.20 | 146.<br>82 | 70.6<br>6 | 137<br>% | 0.1<br>52 |   | 126.<br>09 | 61.2<br>1 | 118<br>% | 0.3<br>02 |   | 0.186<br>3 |   |
| Serum Iron                          | µg/d<br>L  | 100.<br>91 | 12.35 | 102.<br>82 | 34.1<br>9 | 102<br>% | 0.8<br>47 |   | 94.7<br>3  | 22.4<br>1 | 94%      | 0.4<br>08 |   | 0.555<br>3 |   |
| <b>Hormonal</b><br>Estradiol        | pg/m<br>L  | <10        | -     | 34.7<br>3  | 20.7<br>9 | -        | -         | - | 33.7<br>3  | 23.5<br>2 | -        | -         | - | -          | - |
| Follicle<br>Stimulating<br>Hormone  | mIU/<br>mL | 80.9<br>6  | 22.32 | 42.1<br>7  | 19.7<br>2 | 52%      | 0.0<br>00 | * | 43.3<br>0  | 17.4<br>9 | 53%      | 0.0<br>00 | * | 0.000<br>1 | * |
| Progesterone                        | ng/m<br>L  | 0.23       | 0.18  | ≤0.0<br>5  | -         | -        | -         | - | ≤0.0<br>5  | -         | -        | -         | - | -          | - |
| Prolactin                           | ng/m<br>L  | 9.09       | 3.70  | 7.70       | 3.85      | 85%      | 0.1<br>84 |   | 7.29       | 3.61      | 80%      | 0.1<br>84 |   | 0.213<br>2 |   |
| Testosterone                        | ng/m<br>L  | 0.12       | 0.11  | 0.10       | 0.09      | 90%      | 0.4<br>63 |   | 0.12       | 0.11      | 100<br>% | 1.0<br>00 |   | 0.662<br>6 |   |
| Free Testosterone                   | pg/m<br>L  | 1.25       | 1.04  | 1.07       | 0.61      | 86%      | 0.3<br>00 |   | 1.30       | 0.93      | 104<br>% | 0.7<br>13 |   | 0.268<br>2 |   |
| 5 Alpha-<br>Dihydrotestosteron<br>e | ng/m<br>L  | 0.07       | 0.04  | 0.06       | 0.04      | 95%      | 0.7<br>00 |   | 0.08       | 0.04      | 116<br>% | 0.2<br>99 |   | 0.333<br>9 |   |
| Free<br>Triiodothyronine            | pg/m<br>L  | 2.91       | 0.26  | 2.72       | 0.17      | 94%      | 0.0<br>80 |   | 2.88       | 0.27      | 99%      | 0.8<br>38 |   | 0.131<br>1 |   |
| Free Thyroxine                      | ng/d       | 1.17       | 0.16  | 1.18       | 0.18      | 101      | 0.8       |   | 1.20       | 0.16      | 103      | 0.4       |   | 0.795      |   |

|                     |      |      |       |      |      |     |      |  |      |      |     |       |       |
|---------------------|------|------|-------|------|------|-----|------|--|------|------|-----|-------|-------|
|                     | L    |      |       |      |      |     | % 16 |  |      | % 26 |     | 5     |       |
| Adiponectin         | μg/m |      |       |      |      |     | 0.4  |  |      | 0.5  |     | 0.714 |       |
|                     | L    | 5.04 | 1.42  | 4.88 | 1.65 | 97% | 85   |  | 4.89 | 1.63 | 97% | 91    | 1     |
| Leptin              | ng/m | 15.0 |       | 16.2 | 11.1 | 108 | 0.3  |  | 19.5 | 12.7 | 130 | 0.0   | 0.024 |
|                     | L    | 4    | 8.62  | 7    | 4    | %   | 47   |  | 0    | 3    | %   | 44    | 2     |
| <b>Hair-related</b> | ng/m | 43.1 |       | 45.1 | 21.7 | 105 | 0.6  |  | 45.7 | 19.2 | 106 | 0.4   | 0.778 |
|                     | L    | 8    | 12.78 | 6    | 5    | %   | 77   |  | 6    | 4    | %   | 74    | 9     |
| Serum Zinc          | μg/d | 74.5 |       | 71.1 |      |     | 0.3  |  | 71.7 |      |     | 0.3   | 0.490 |
|                     | L    | 5    | 10.32 | 8    | 5.27 | 95% | 52   |  | 3    | 9.49 | 96% | 85    | 7     |
