# Supplementary material for: Clinical and phototrichogrammatic evaluation of estradiol replacement therapy on hair growth in postmenopausal Japanese women with female pattern hair loss: a pilot study
Source: PubMed Central journal article supplement — Int J Womens Dermatol. 2023 Nov 1;9(4):e109. doi: 10.1097/JW9.0000000000000109 (PMC10615536; doi:10.1097/jw9.0000000000000109), 2023-11-01
Supplement: jw9-9-e109-s007.pdf [file jw9-9-e109-s007.pdf]

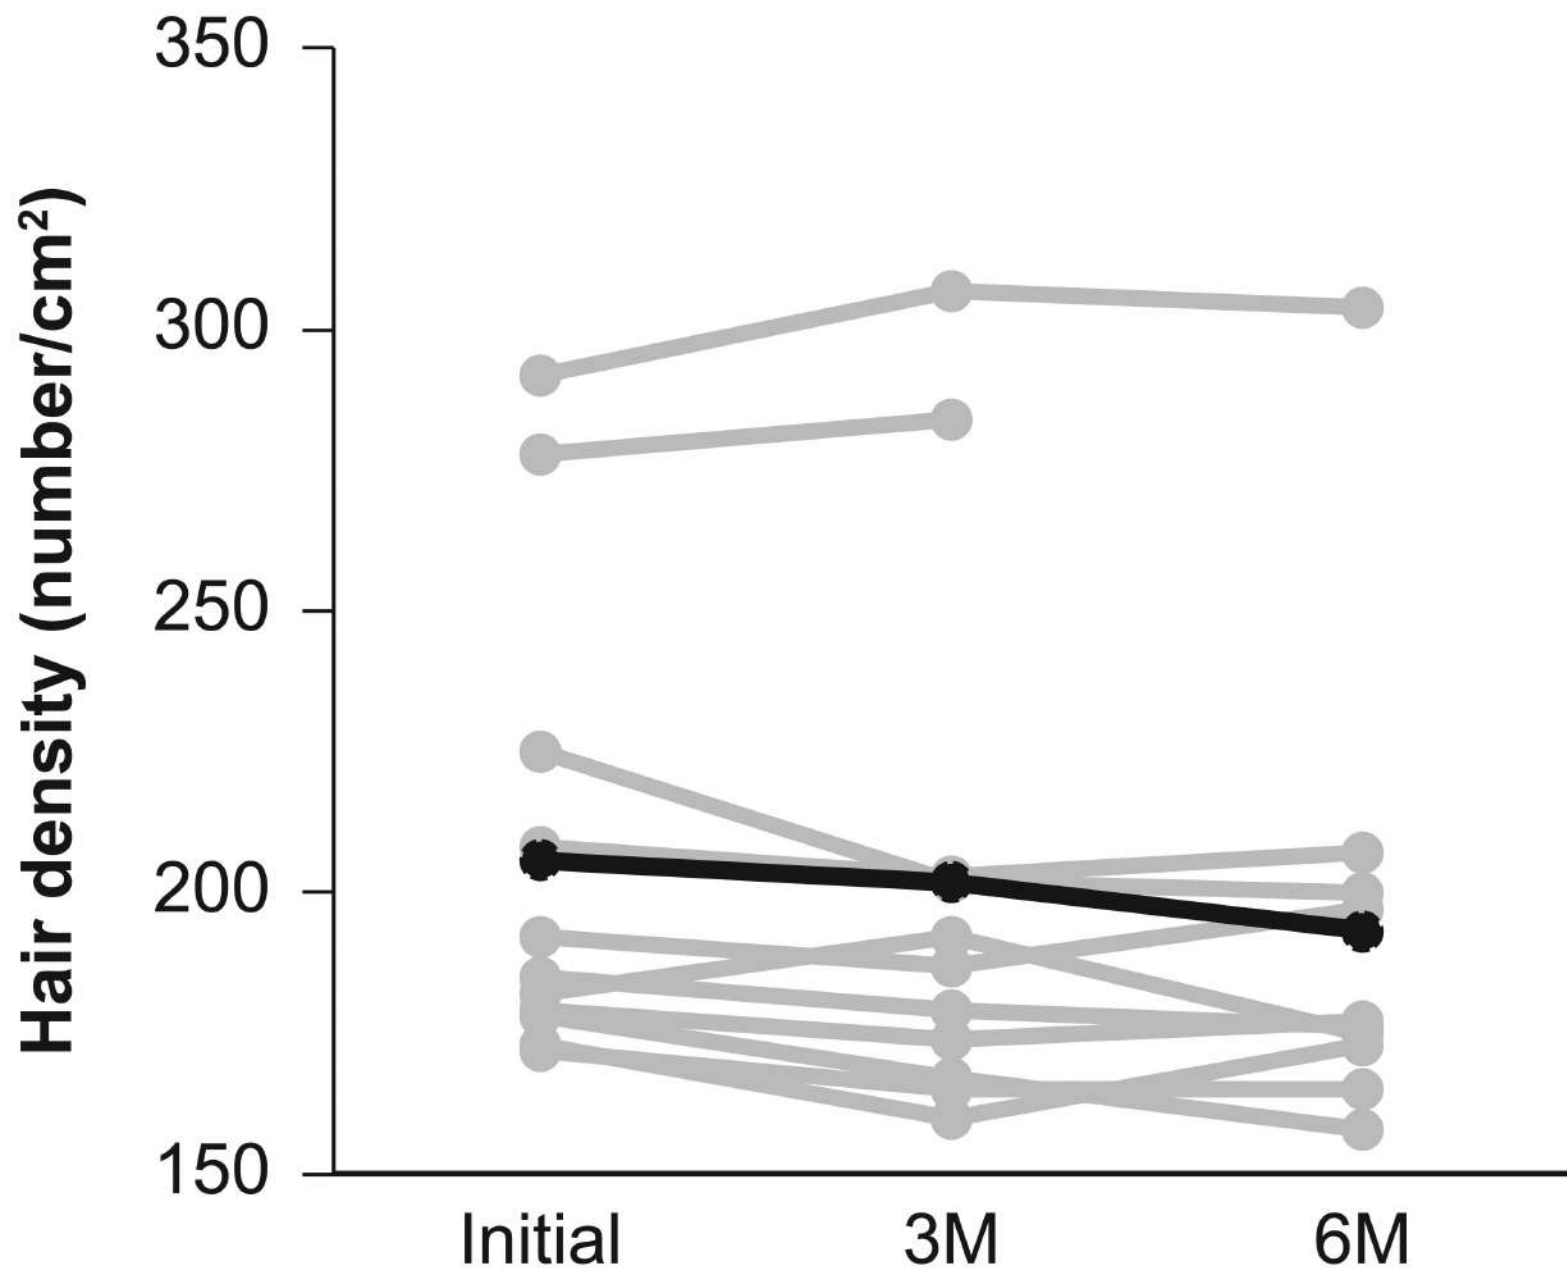

**Supplemental Figure 6.** Changes in the hair density over time (the gray lines in the graph show the measured values for each subject; the bold line indicates the mean value)

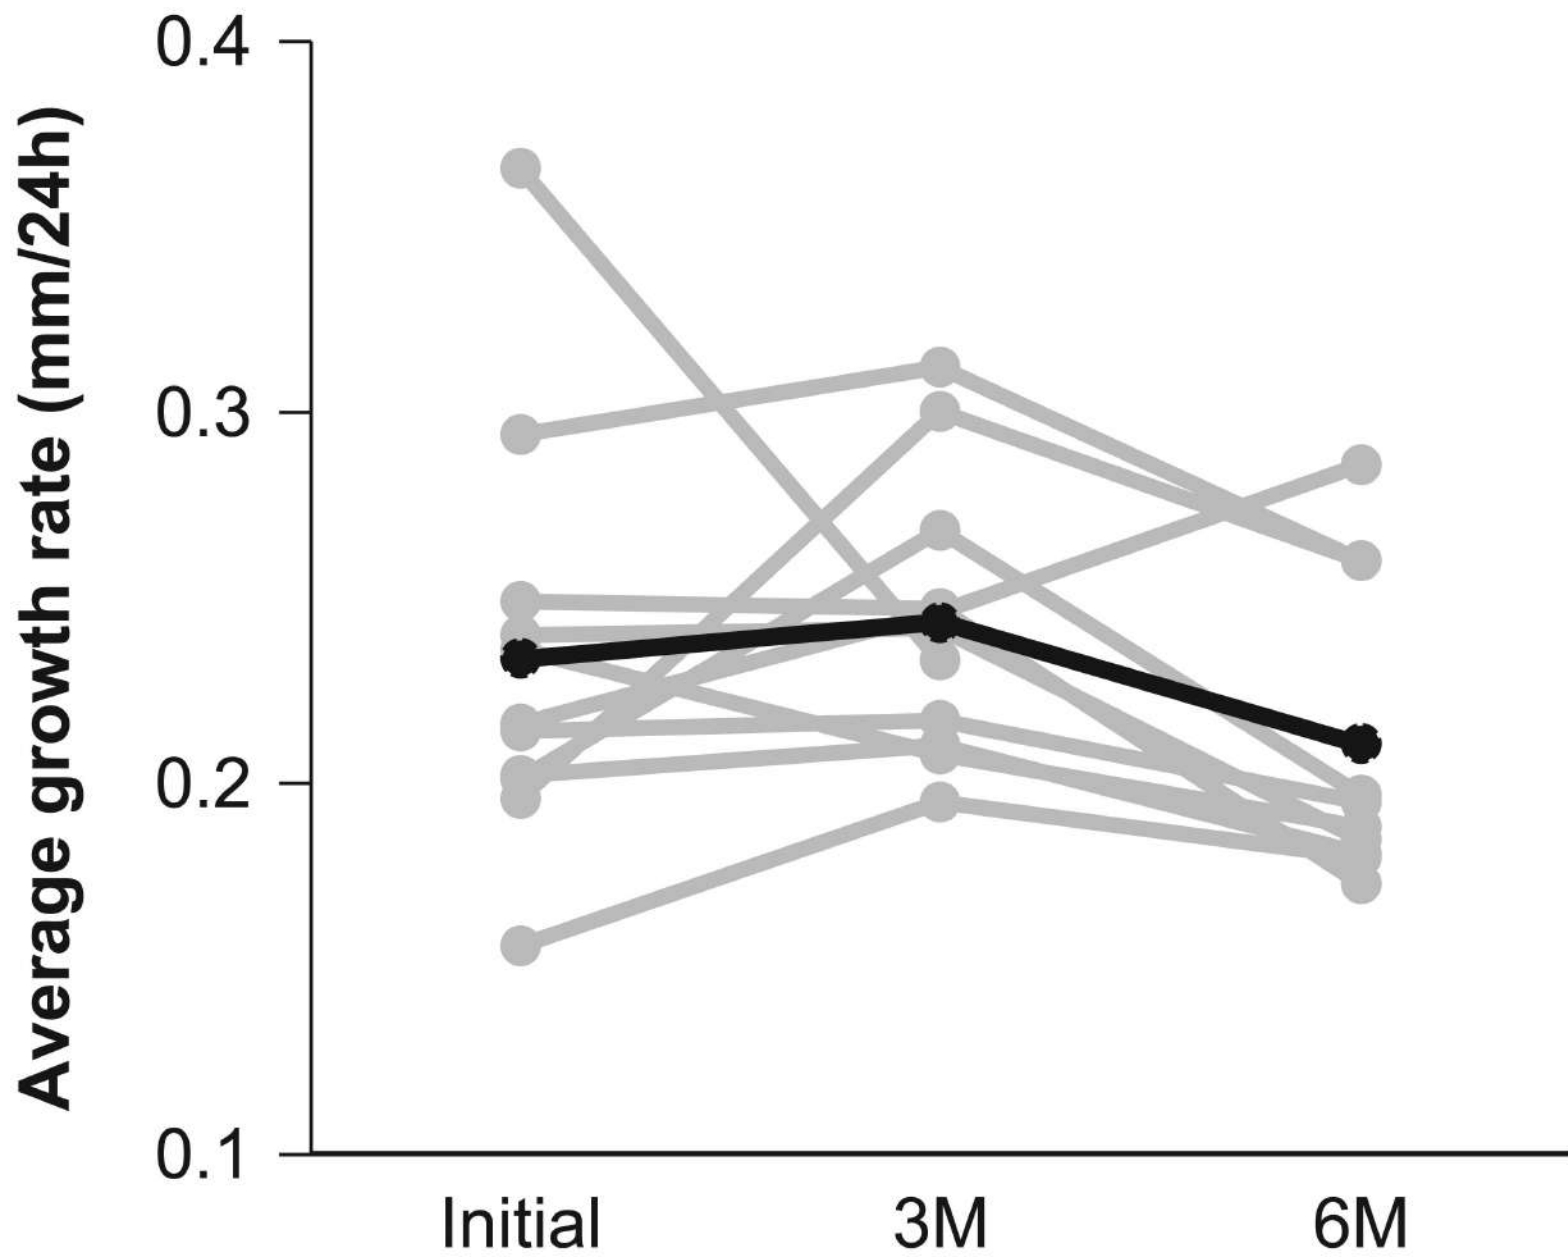

**Supplemental Figure 7.** Changes in the average growth rate over time (the gray lines in the graph show the measured values for each subject; the bold line indicates the mean value)

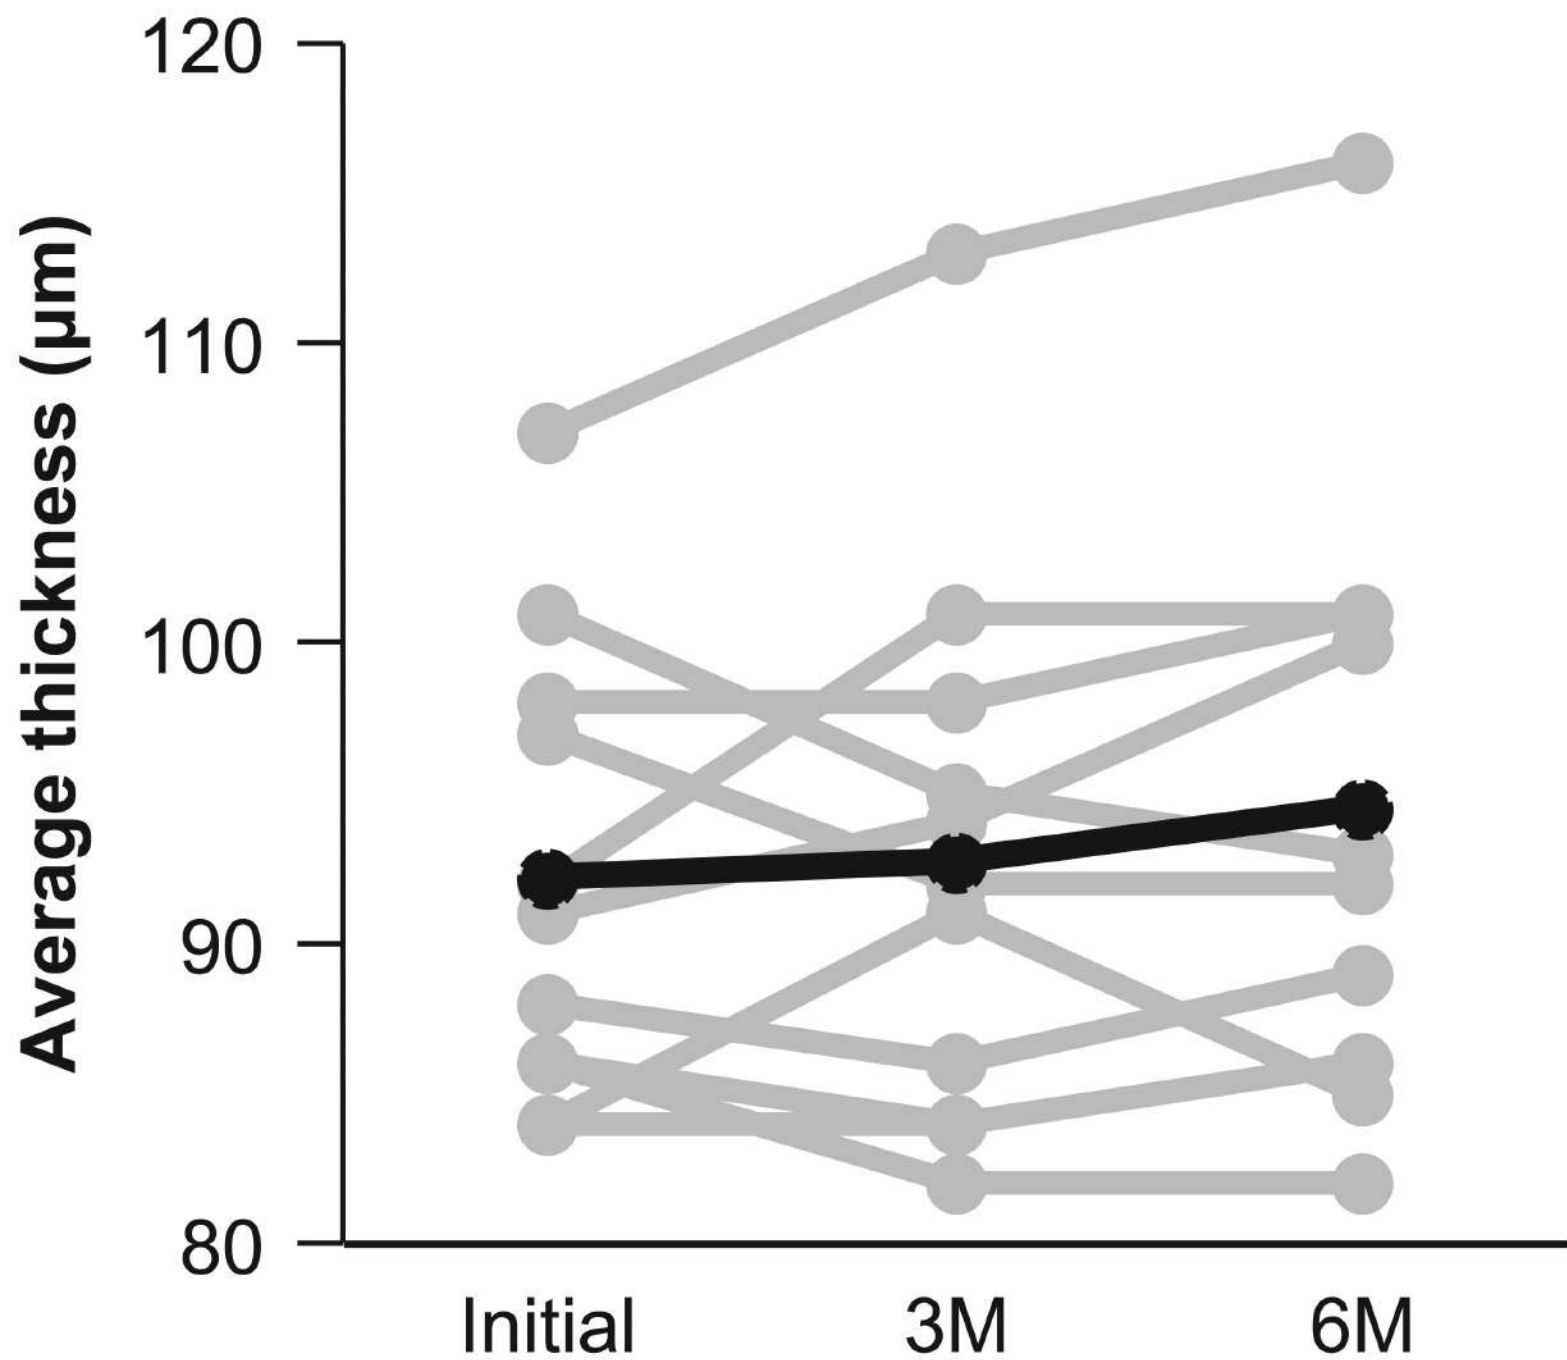

**Supplemental Figure 8.** Changes in the average thickness over time (the gray lines in the graph show the measured values for each subject; the bold line indicates the mean value)
