# Supplementary figures and images for: Clinical and phototrichogrammatic evaluation of estradiol replacement therapy on hair growth in postmenopausal Japanese women with female pattern hair loss: a pilot study
Source: PubMed Central journal article supplement — Int J Womens Dermatol. 2023 Nov 1;9(4):e109. doi: 10.1097/JW9.0000000000000109 (PMC10615536; doi:10.1097/jw9.0000000000000109), 2023-11-01

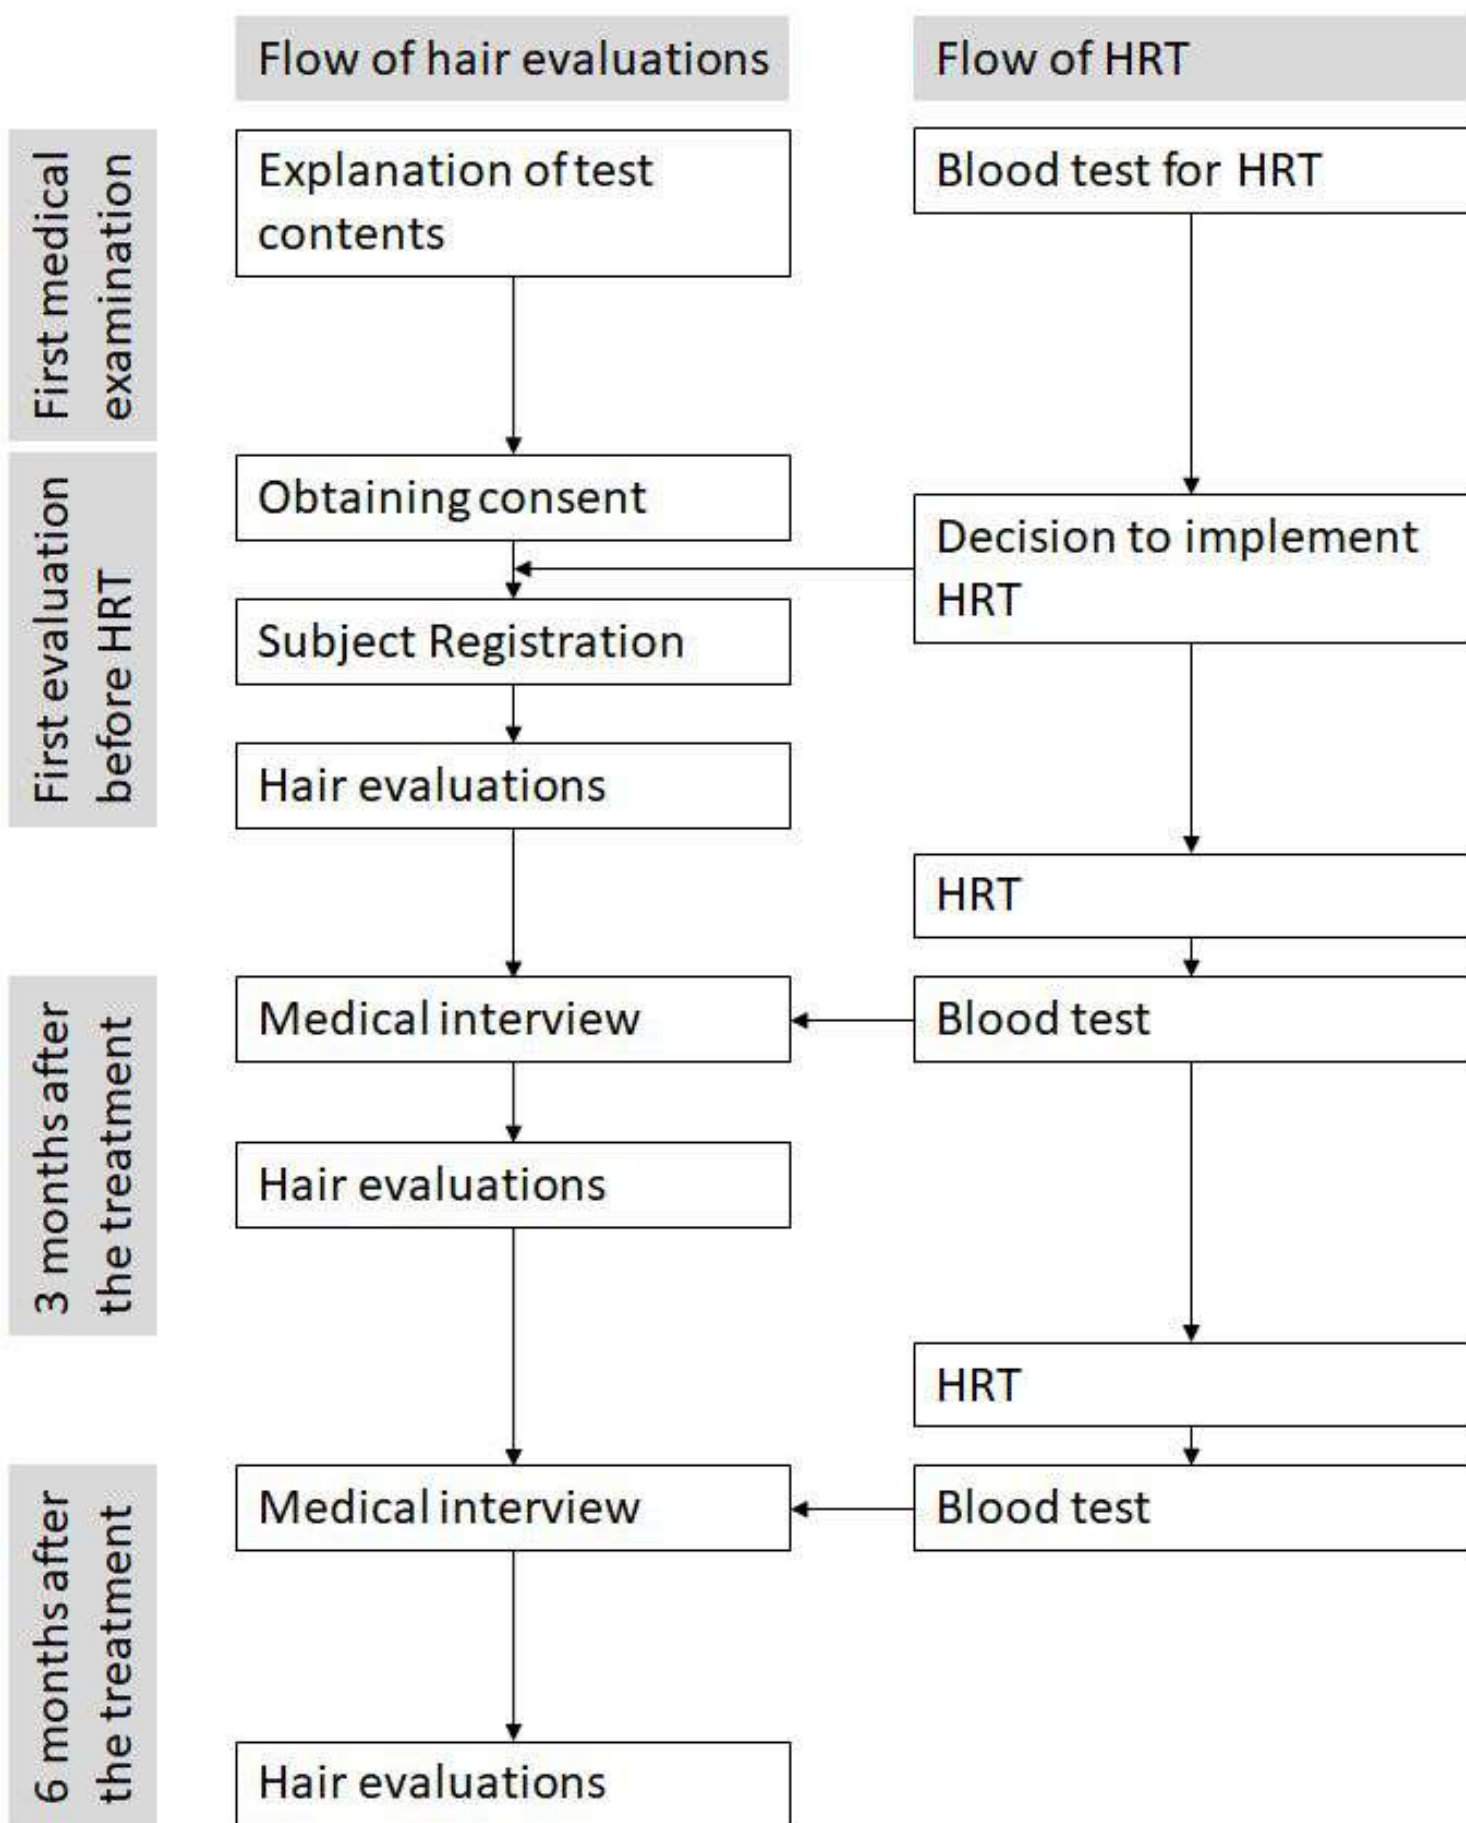

**Supplemental Figure 2. Study flow diagram**

Supplement: jw9-9-e109-s003.pdf [file jw9-9-e109-s003.pdf]

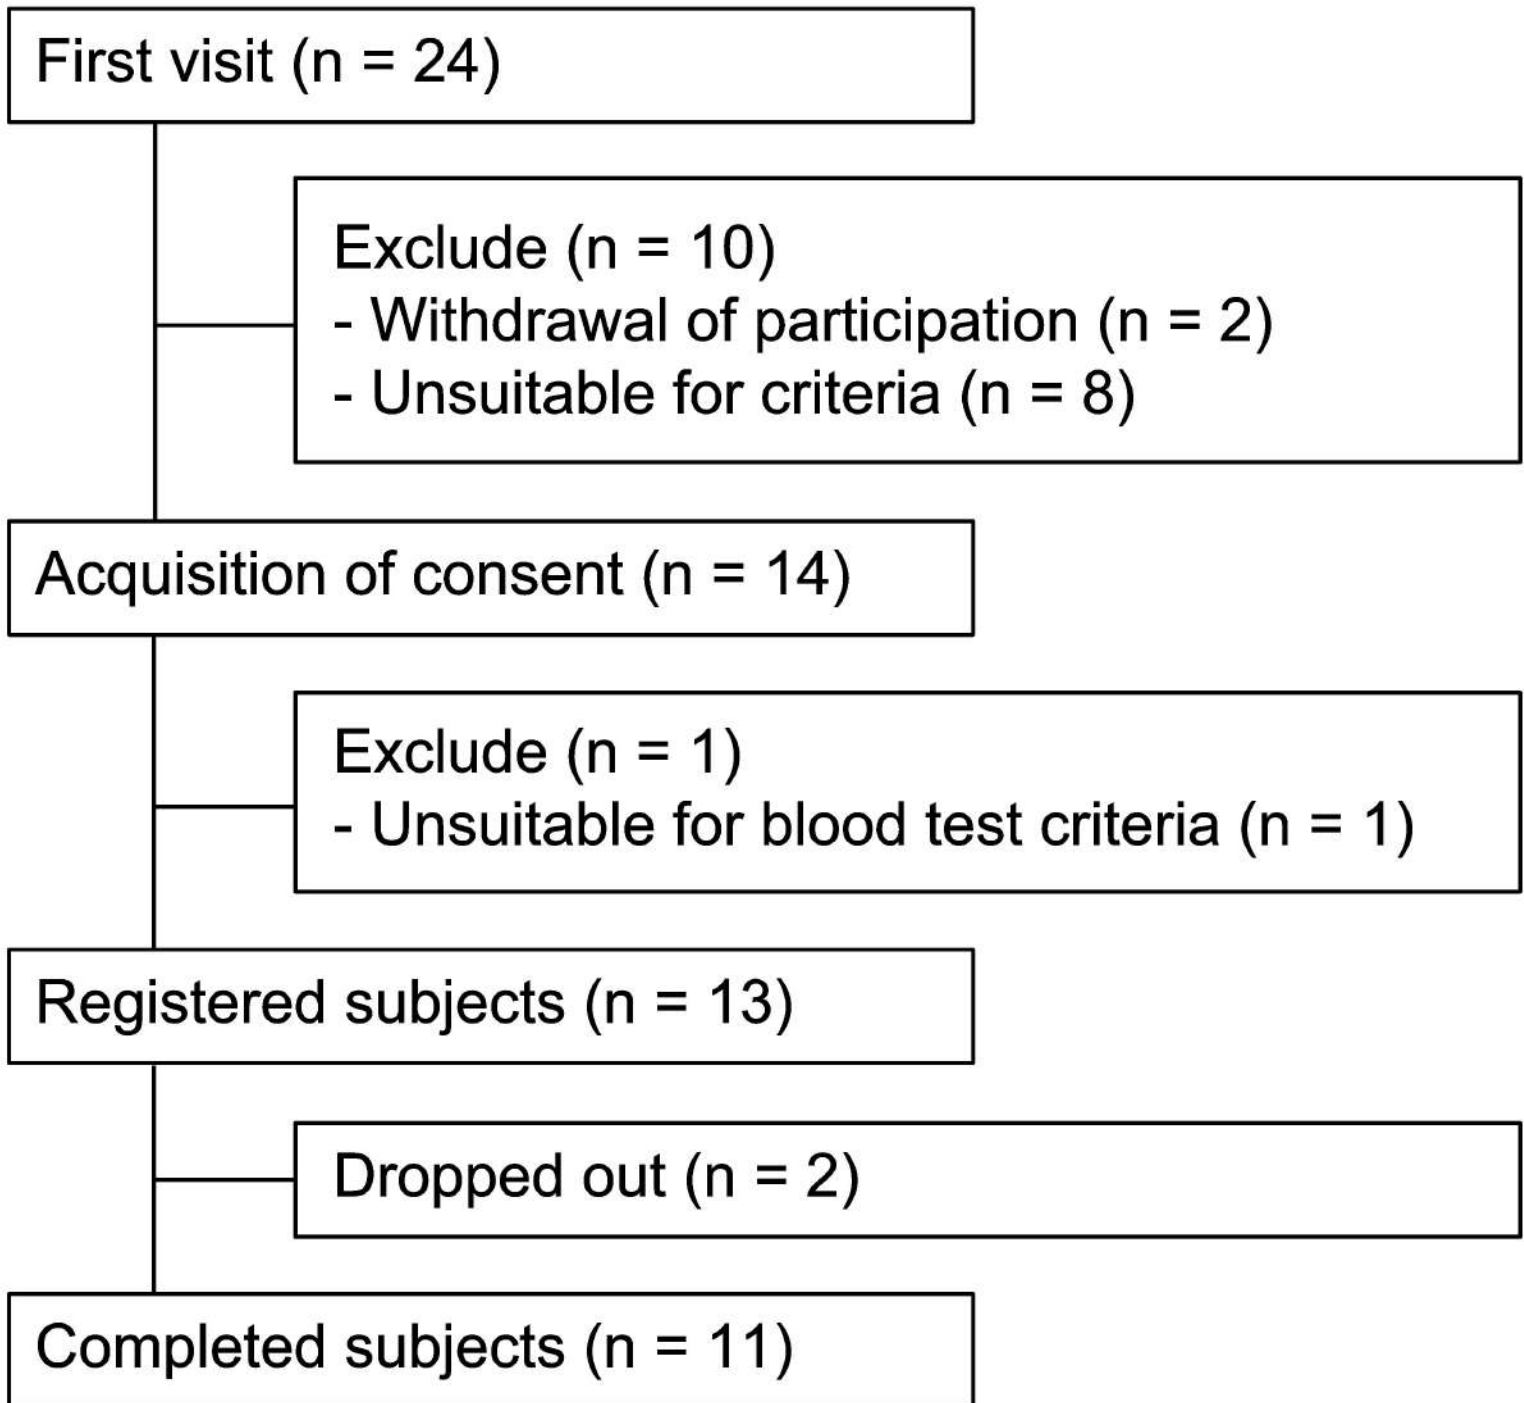

**Supplemental Figure 3.** Transition of subjects

Supplement: jw9-9-e109-s004.pdf [file jw9-9-e109-s004.pdf]

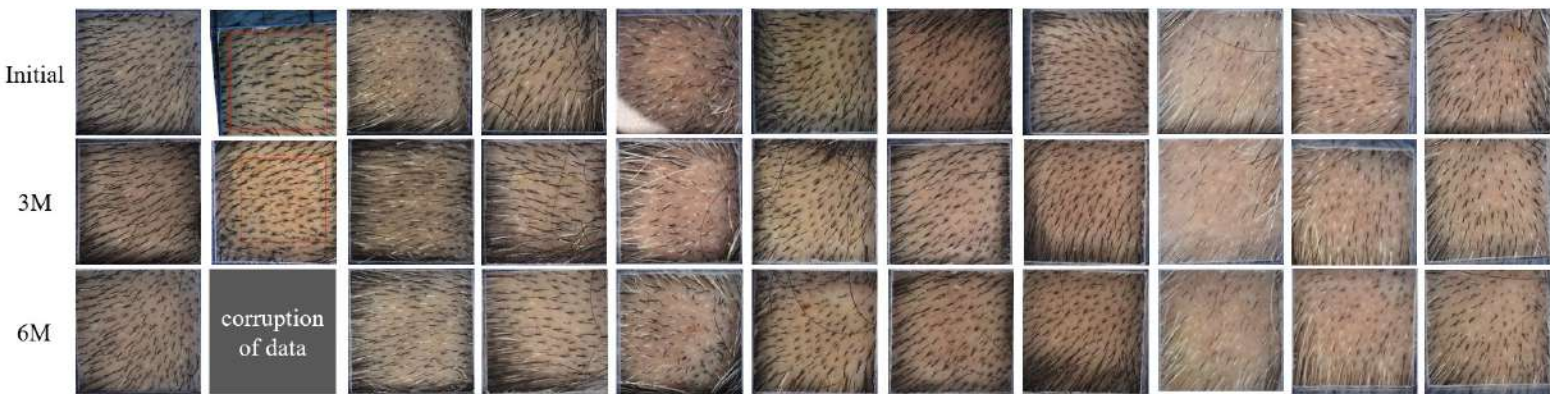

**Supplemental Figure 5.** Changes over time in the phototrichograms of the subjects.

Supplement: jw9-9-e109-s006.pdf [file jw9-9-e109-s006.pdf]
